# Supplementary material for: Vulnerability in a Populated Coastal Zone and Its Influence by Oil Wells in Santa Elena, Ecuador
Source: MDPI journal article supplement (doi:10.3390/resources11080070), 2022-07-29
Supplement: s1 [file s1]

## SUPPLEMENTARY MATERIALS

Article

### Vulnerability in a populated coastal zone and its influence by oil wells in Santa Elena, Ecuador.

Supplementary Materials:

**Table S1.** Comparison of studies presenting different methodologies for the vulnerability assessment of the oil and gas industry.

| V.T. |   |   | E. T.          |                | M. |   | Contribution   |                                                                                                                                    |                                                                                                                     |
|------|---|---|----------------|----------------|----|---|----------------|------------------------------------------------------------------------------------------------------------------------------------|---------------------------------------------------------------------------------------------------------------------|
| Y    | S | P | E <sub>n</sub> | E <sub>c</sub> | I  | C | Q <sub>n</sub> | Q <sub>t</sub>                                                                                                                     |                                                                                                                     |
| 2002 |   |   | X              |                |    | X | X              | Methodology to identify the vulnerability of seabird species to potential oil spills through risk and environmental analysis [52]. |                                                                                                                     |
| 2003 |   |   | X              |                | X  | X |                | Review and analysis of the vulnerability of different vertebrate species due to oil pollutants and metals [53].                    |                                                                                                                     |
| 2004 | X |   | X              |                |    | X | X              | Oil spill analysis through theoretical, practical and applied approaches [44].                                                     |                                                                                                                     |
| 2005 | X | X | X              |                | X  | X | X              | Methodology to identify vulnerability for gas pipelines to potential seismic events using probabilistic models [56].               |                                                                                                                     |
| 2006 |   | X | X              |                | X  | X | X              | Groundwater vulnerability assessment methodology using GIS, fuzzy logic and decision-making techniques [48].                       |                                                                                                                     |
| 2007 | X | X |                |                | X  | X | X              | Analysis of oil infrastructure vulnerability due to vandalism through risk analysis [58].                                          |                                                                                                                     |
| 2008 |   |   |                | X              |    |   | X              | Methodology to identify the vulnerability of oil-importing countries to high prices per barrel [39].                               |                                                                                                                     |
| 2009 | X | X | X              | X              |    | X | X              | Integral vulnerability model for oil spills on shorelines [40].                                                                    |                                                                                                                     |
| 2010 | X |   | X              |                |    | X | X              | Methodology to identify the vulnerability of mangroves and villages to oil spills [41].                                            |                                                                                                                     |
| 2011 |   |   | X              |                | X  | X | X              | Vulnerability assessment model for confined groundwater to oil contamination [46].                                                 |                                                                                                                     |
| 2012 |   | X | X              |                |    | X | X              | Model for oil spill risk assessment and the simulation of hydrodynamics using finite elements [42].                                |                                                                                                                     |
| 2013 | X |   | X              | X              |    | X | X              | Quantitative assessment of oil spills in coastal areas comprising different indicators [43].                                       |                                                                                                                     |
| 2014 |   |   |                | X              |    | X | X              | Model of seabird vulnerability caused by the development of offshore oil and gas platforms. [51].                                  |                                                                                                                     |
| 2015 |   | X |                |                |    | X | X              | X                                                                                                                                  | Model for assessing the risks and vulnerability caused by an oil refinery in coastal areas [54].                    |
| 2016 | X | X |                | X              |    | X | X              | Model for assessing coastal zone vulnerability to energy infrastructure development [55].                                          |                                                                                                                     |
| 2017 | X |   |                |                |    |   | X              | X                                                                                                                                  | Vulnerability analysis for exposure to airborne petroleum products and attention deficit disorder in children [50]. |
| 2018 |   | X |                |                | X  | X | X              | Analysis model for oil infrastructure vulnerability to possible corrosion due to different conditions [57].                        |                                                                                                                     |
| 2019 |   |   | X              |                | X  | X | X              | X                                                                                                                                  | Model for assessing the vulnerability of aquifers to oil exploitation activities [47].                              |
| 2020 |   |   | X              |                | X  | X | X              | Model for assessing vulnerability to oil spills in sensitive environments. [45].                                                   |                                                                                                                     |
| 2021 |   |   | X              |                | X  |   | X              | Vulnerability assessment model for watershed fracking development in mountainous areas [49].                                       |                                                                                                                     |

Y (Year). V.T. (vulnerability type: S, Social; P, Physical; E<sub>n</sub>, Environmental; E<sub>c</sub>, Economical); E.T. (Environment type: I, Interior; C, Coastal); M. (Methodology: Q<sub>n</sub>, Quantitative; Q<sub>l</sub>, Qualitative).
